# Supplementary material for: Evidence of a Set of Core-Function Genes in 16 Bacillus Podoviral Genomes with Considerable Genomic Diversity
Source: MDPI journal article supplement (doi:10.3390/v15020276), 2023-01-18
Supplement: s1 [file s1]

Supplemental Table S1: Average Nucleotide Identity

|                | Ademby | RadRaab | StevenHerd11 | Stitch | Thornton | Claudi | KonjoTrouble | SerPounce | Aurora | Baseball_field | DK1 | Dlc1 | MG-B1 | BeachBum | Harambe | VMY22 | Whiting18 | Arbo | phi29 | B103 | Karezi | GA1 | WhyPhy | PumA2 | Cp1 |
|----------------|--------|---------|--------------|--------|----------|--------|--------------|-----------|--------|----------------|-----|------|-------|----------|---------|-------|-----------|------|-------|------|--------|-----|--------|-------|-----|
| Ademby         |        | 99      | 99           | 99     | 91       | 90     | 90           | 89        | 87     | 90             | 75  | 74   | 73    | 61       | 60      | 58    | 56        | 56   | 55    | 57   | 56     | 57  | 57     | 56    | 52  |
| RadRaab        | 99     |         | 100          | 99     | 90       | 90     | 90           | 89        | 87     | 90             | 76  | 72   | 74    | 60       | 60      | 58    | 57        | 57   | 56    | 57   | 56     | 57  | 57     | 57    | 51  |
| StevenHerd11   | 99     | 100     |              | 99     | 90       | 90     | 90           | 89        | 87     | 90             | 76  | 72   | 74    | 60       | 60      | 58    | 56        | 57   | 56    | 57   | 56     | 57  | 57     | 57    | 51  |
| Stitch         | 99     | 99      | 99           |        | 91       | 91     | 90           | 89        | 87     | 91             | 75  | 74   | 74    | 61       | 60      | 58    | 56        | 56   | 56    | 57   | 56     | 57  | 57     | 56    | 51  |
| Thornton       | 91     | 90      | 90           | 91     |          | 96     | 96           | 94        | 88     | 95             | 76  | 73   | 74    | 60       | 60      | 57    | 56        | 56   | 56    | 57   | 55     | 57  | 56     | 56    | 52  |
| Claudi         | 90     | 90      | 90           | 91     | 96       |        | 96           | 94        | 88     | 96             | 76  | 72   | 74    | 60       | 59      | 57    | 0         | 55   | 55    | 57   | 55     | 57  | 56     | 56    | 51  |
| KonjoTrouble   | 90     | 90      | 90           | 90     | 96       | 96     |              | 93        | 88     | 95             | 76  | 73   | 74    | 59       | 59      | 57    | 57        | 57   | 55    | 56   | 56     | 57  | 57     | 56    | 51  |
| SerPounce      | 89     | 89      | 89           | 89     | 94       | 94     | 93           |           | 88     | 96             | 77  | 72   | 75    | 60       | 60      | 57    | 56        | 57   | 56    | 57   | 56     | 57  | 57     | 56    | 52  |
| Aurora         | 87     | 87      | 87           | 87     | 88       | 88     | 88           | 88        |        | 88             | 76  | 72   | 73    | 60       | 60      | 58    | 57        | 57   | 56    | 57   | 56     | 56  | 56     | 55    | 52  |
| Baseball_field | 90     | 90      | 90           | 91     | 95       | 96     | 95           | 96        | 88     |                | 76  | 72   | 74    | 60       | 60      | 57    | 56        | 56   | 55    | 57   | 56     | 56  | 57     | 56    | 52  |
| DK1            | 75     | 76      | 76           | 75     | 76       | 76     | 76           | 77        | 76     | 76             |     | 73   | 73    | 60       | 59      | 58    | 55        | 55   | 55    | 56   | 56     | 56  | 57     | 58    | 51  |
| Dlc1           | 74     | 72      | 72           | 74     | 73       | 72     | 73           | 72        | 72     | 72             | 73  |      | 72    | 60       | 60      | 58    | 56        | 56   | 56    | 57   | 55     | 56  | 57     | 56    | 52  |
| MG-B1          | 73     | 74      | 74           | 74     | 74       | 74     | 74           | 75        | 73     | 74             | 73  | 72   |       | 59       | 59      | 58    | 57        | 57   | 56    | 58   | 56     | 56  | 56     | 57    | 52  |
| BeachBum       | 61     | 60      | 60           | 61     | 60       | 60     | 59           | 60        | 60     | 60             | 60  | 60   | 59    |          | 96      | 60    | 56        | 55   | 56    | 58   | 55     | 56  | 57     | 57    | 52  |
| Harambe        | 60     | 60      | 60           | 60     | 60       | 59     | 59           | 60        | 60     | 60             | 59  | 60   | 59    | 96       |         | 60    | 56        | 56   | 56    | 58   | 56     | 57  | 56     | 57    | 52  |
| VMY22          | 58     | 58      | 58           | 58     | 57       | 57     | 57           | 57        | 58     | 57             | 58  | 58   | 58    | 60       | 60      |       | 58        | 58   | 57    | 58   | 56     | 56  | 57     | 56    | 52  |
| Whiting18      | 56     | 57      | 56           | 56     | 56       | 55     | 57           | 56        | 57     | 56             | 55  | 56   | 57    | 56       | 56      | 58    |           | 99   | 90    | 68   | 57     | 57  | 58     | 56    | 51  |
| Arbo           | 56     | 57      | 57           | 56     | 56       | 55     | 57           | 57        | 57     | 56             | 55  | 56   | 57    | 55       | 56      | 58    | 99        |      | 90    | 68   | 57     | 57  | 58     | 57    | 51  |
| phi29          | 55     | 56      | 56           | 56     | 56       | 55     | 55           | 56        | 56     | 55             | 55  | 56   | 56    | 56       | 56      | 57    | 90        | 90   |       | 68   | 57     | 57  | 58     | 58    | 51  |
| B103           | 57     | 57      | 57           | 57     | 57       | 57     | 56           | 57        | 57     | 57             | 56  | 57   | 58    | 58       | 58      | 58    | 68        | 68   | 68    |      | 57     | 58  | 58     | 58    | 51  |
| Karezi         | 56     | 56      | 56           | 56     | 55       | 55     | 56           | 56        | 56     | 56             | 56  | 55   | 56    | 55       | 56      | 56    | 57        | 57   | 57    | 57   |        | 64  | 57     | 57    | 50  |
| GA1            | 57     | 57      | 57           | 57     | 57       | 57     | 57           | 57        | 56     | 56             | 56  | 56   | 56    | 56       | 57      | 56    | 57        | 57   | 57    | 58   | 64     |     | 58     | 58    | 52  |
| WhyPhy         | 57     | 57      | 57           | 57     | 56       | 56     | 57           | 57        | 56     | 57             | 57  | 57   | 56    | 57       | 56      | 57    | 58        | 58   | 58    | 58   | 57     | 58  |        | 86    | 51  |
| PumA2          | 56     | 57      | 57           | 56     | 56       | 56     | 56           | 56        | 55     | 56             | 58  | 56   | 57    | 57       | 57      | 56    | 56        | 57   | 58    | 58   | 57     | 58  | 86     |       | 51  |
| Cp1            | 52     | 51      | 51           | 51     | 52       | 51     | 51           | 52        | 52     | 52             | 51  | 52   | 52    | 52       | 52      | 52    | 51        | 51   | 51    | 51   | 50     | 52  | 51     | 51    |     |
