# Supplementary material for: Evidence of a Set of Core-Function Genes in 16 Bacillus Podoviral Genomes with Considerable Genomic Diversity
Source: MDPI journal article supplement (doi:10.3390/v15020276), 2023-01-18
Supplement: s1 [file s1]

| Phage        | Ref.       | pRNA range | Length |
|--------------|------------|------------|--------|
| GA-1         | [51]       | 1879-1719  | 160    |
| phi29        | [50]       | 321-147    | 174    |
|              |            |            |        |
| Ademby       | this study | 365-203    | 163    |
| RadRaab      | [52]       | 375-213    | 163    |
| StevenHerd11 | this study | 374-212    | 163    |
| Stitch       | [52]       | 375-213    | 163    |
| KonjoTrouble | [52]       | 375-213    | 163    |
| Claudi       | [52]       | 376-214    | 163    |
| Thornton     | this study | 376-214    | 163    |
| SerPounce    | [52]       | 378-216    | 163    |
| Aurora       | [52]       | 378-216    | 163    |
| Juan         | [52]       | 375-213    | 163    |
| BeachBum     | [52]       | 288-122    | 166    |
| Harambe      | [52]       | 288-122    | 166    |
| Karezi       | this study | 1075-911   | 164    |
| WhyPhy       | this study | 212-23     | 189    |
| Whiting      | this study | 352-179    | 174    |
| Arbo1        | this study | 314-174    | 174    |

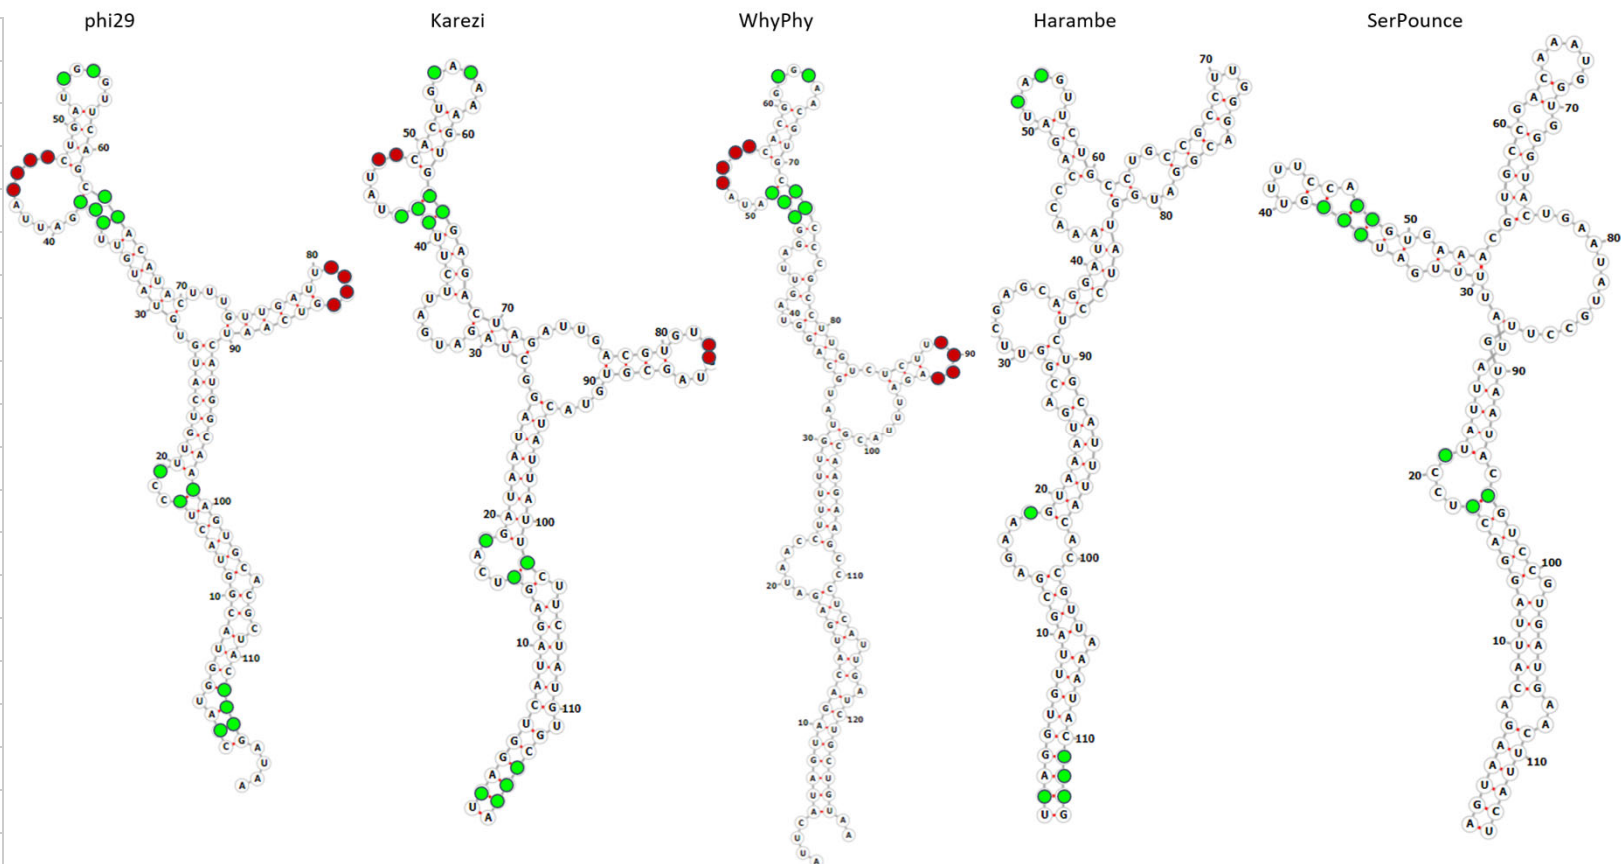

Supplementary Figure S2
