# Supplementary material for: Evidence of a Set of Core-Function Genes in 16 Bacillus Podoviral Genomes with Considerable Genomic Diversity
Source: Viruses. 2023 Jan 18;15(2):276. doi: 10.3390/v15020276 (PMC9965433; doi:10.3390/v15020276)
Supplement: Supplementary file 1 [file viruses-15-00276-s001.zip]

Archive with 4 entries (4 files):
- Supplementary Figure legends.pdf
- Supplementary Figure S1 Phamerator maps of phage genomes.pdf
- Supplementary Figure S2 prna prediction.pdf
- Supplementary Table S1.pdf
