# Supplementary material for: Evidence of a Set of Core-Function Genes in 16 Bacillus Podoviral Genomes with Considerable Genomic Diversity
Source: Viruses. 2023 Jan 18;15(2):276. doi: 10.3390/v15020276 (PMC9965433; doi:10.3390/v15020276)
Supplement: Supplementary file 1 [file viruses-15-00276-s001.zip › Supplementary Figure S1 Phamerator maps of phage genomes.pdf]

Demby

RadRaab

StevenHerd11

Stfch

KonjoTrouble

Claudi

Thornton

SerPounce

Aurora

Juan

Baseball\_field

MG-B1

BeachBum

Harambe

GA1

Karezi

phi29

Arbo1

Whiting18

vB\_Bpu\_PumA2

WhyPhy
