# Supplementary figures and images for: Evidence of a Set of Core-Function Genes in 16 Bacillus Podoviral Genomes with Considerable Genomic Diversity
Source: MDPI journal article supplement (doi:10.3390/v15020276), 2023-01-18

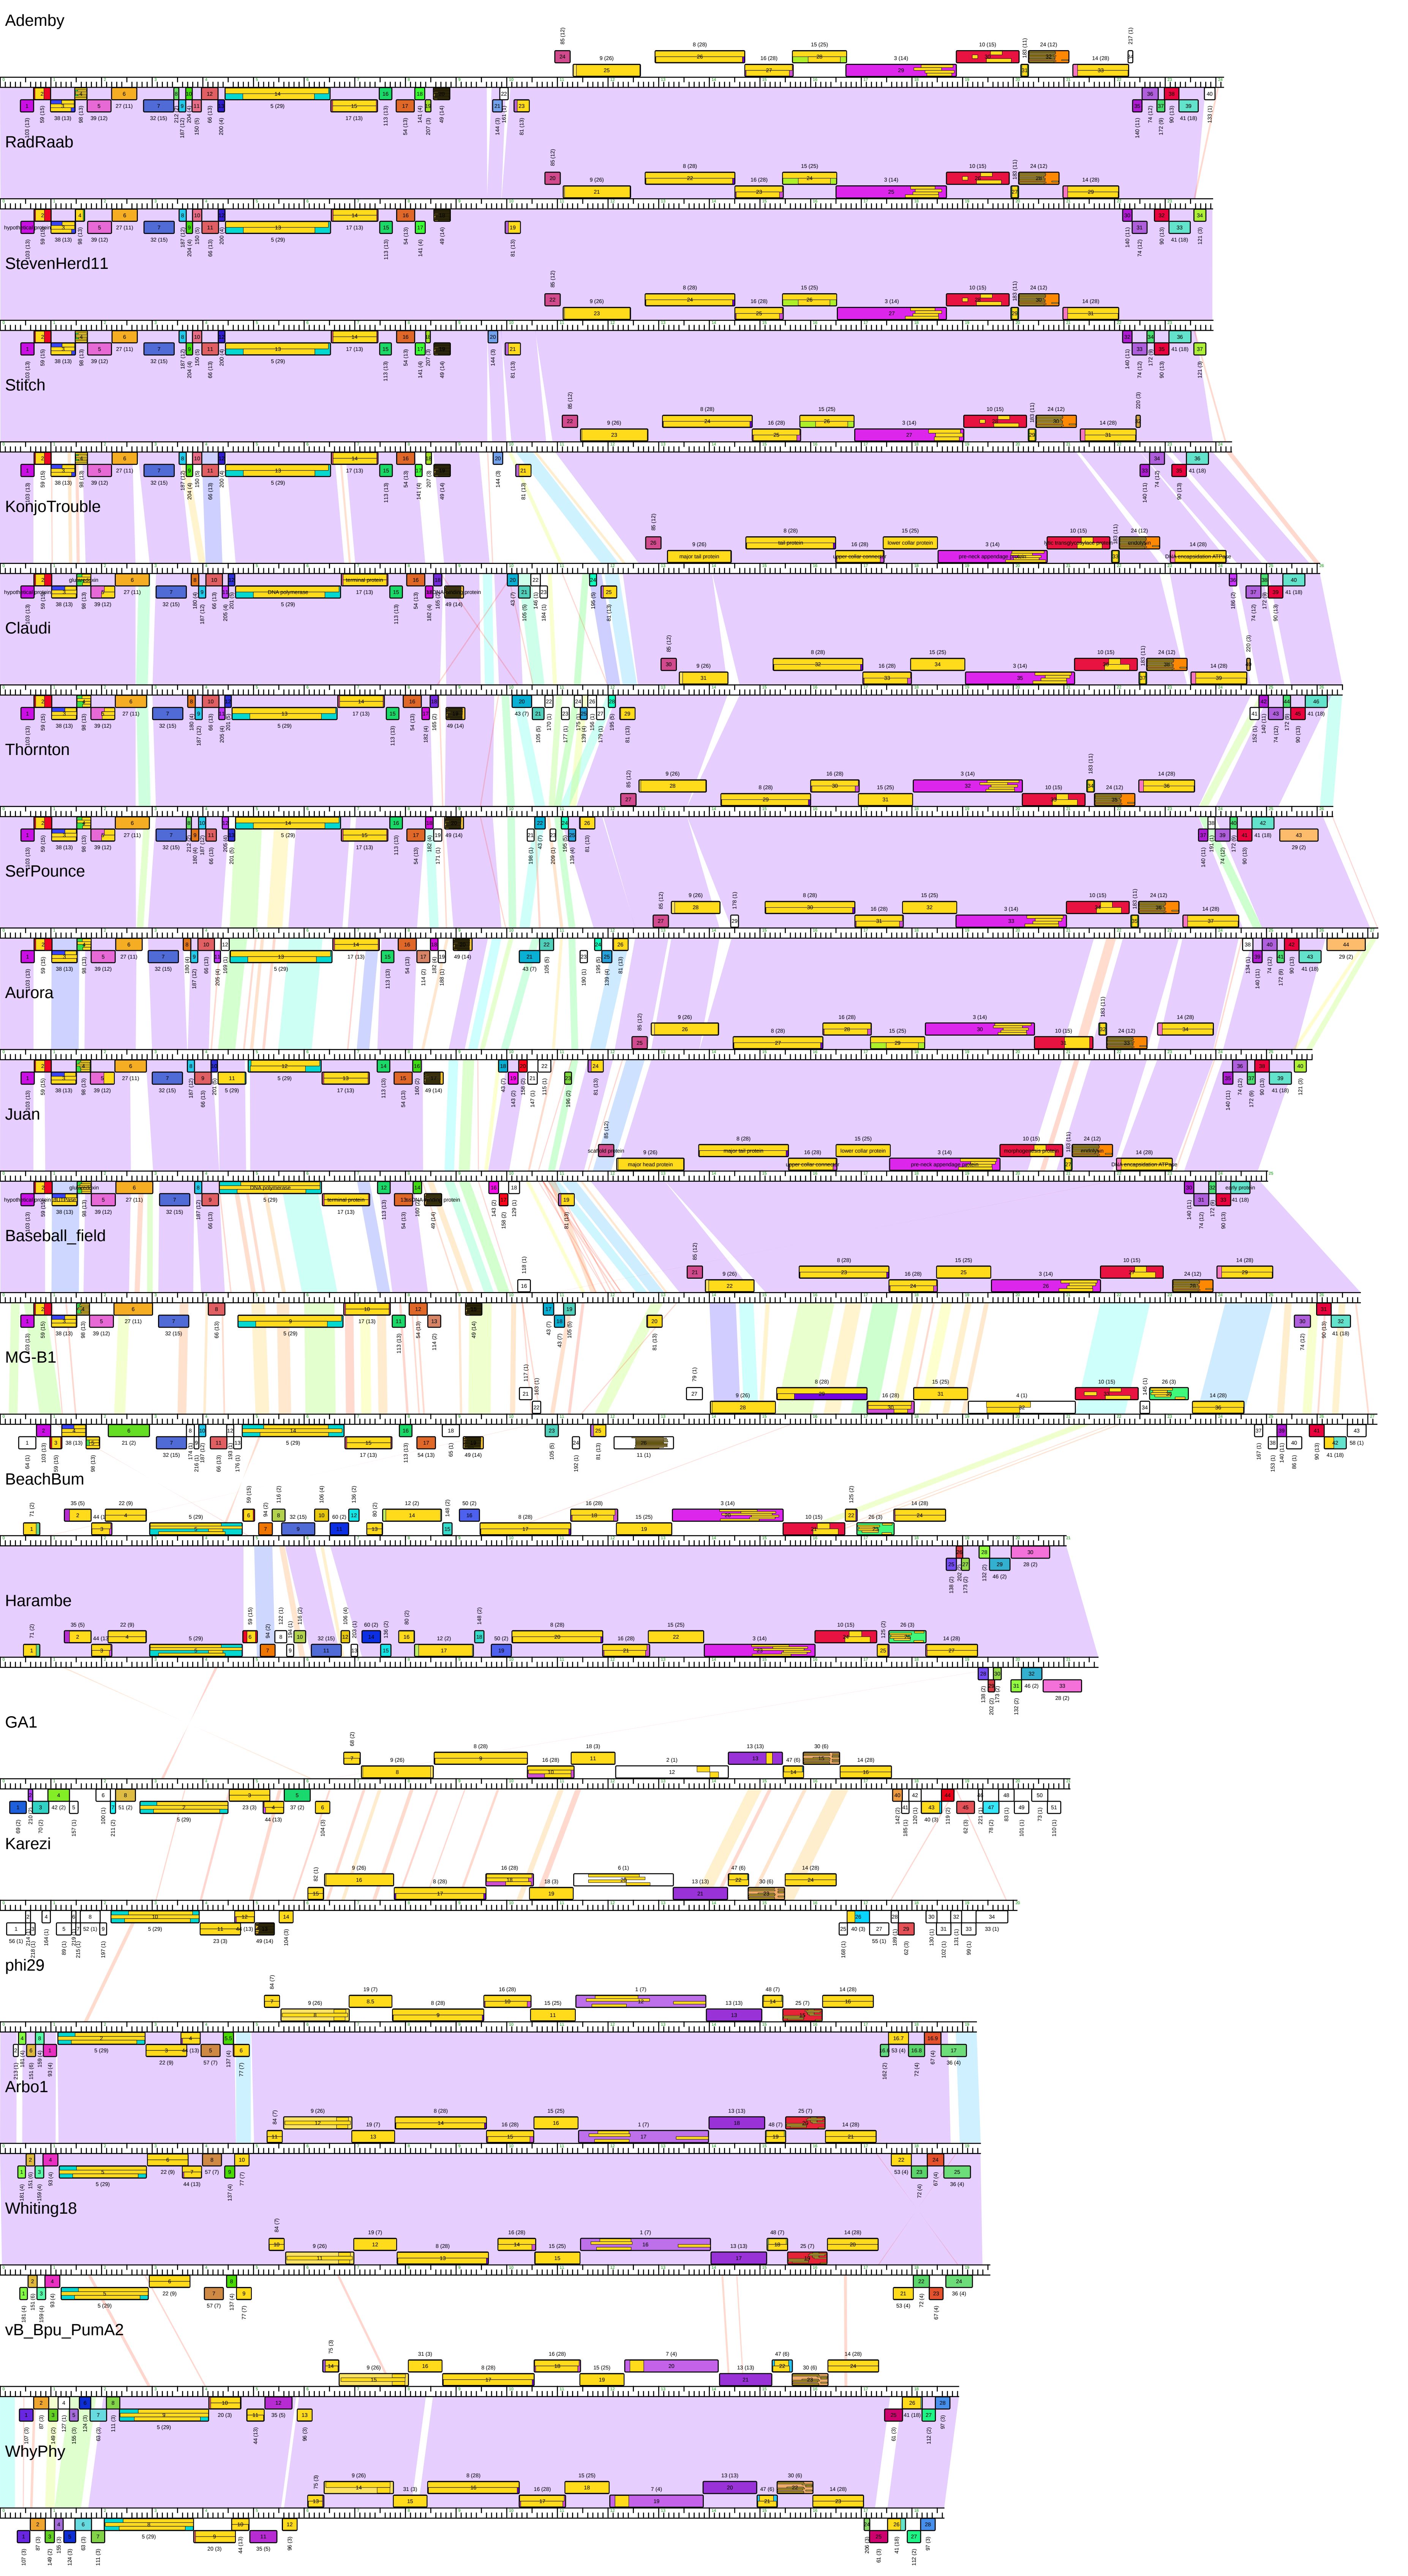

Supplement: s1 [file s1]
